# Supplementary material for: Surgeons’ Opinions on Lymphadenectomy in Melanoma Patients with Positive Sentinel Nodes: A Worldwide Web-Based Survey
Source: Springer Nature journal article supplement (doi:10.1245/s10434-012-2483-3), 2012-07-18
Supplement: MOESM2 [file 10434_2012_2483_MOESM2_ESM.doc]

**Appendix 2**. List of the 134 Institutions which consented to participate in the survey.

Department of Surgical Oncology Sydney, Westmead hospital, Sydney, New South Wales, Australia

Melanoma & Skin Surgical Oncology, Peter McCallum Cancer Centre, Melbourne, Victoria, Australia

Melanoma Institute Australia, Sydney, New South Wales, Australia

Discipline of Surgery, Royal Adelaide Hospital, Adelaide, South Australia, Australia

Department of Surgery, University of Queensland, Princess Alexandra Hospital, Brisbane, Queensland, Australia

Victorian Melanoma Service and Dermatology Unit, Alfred Hospital, Melbourne, Victoria, Australia.

Department of Dermatology, Medical University of Graz, Graz, Austria

Dermatological Clinic, Department of Medicine, CHU Albert Michallon, Grenoble cedex 09, Belgium

Oncology Center, Hospital Sirio-Libanes, São Paulo, Brazil

Department of Surgical Oncology, São Paulo University School of Medicine, Brazil

Department of Surgery, Surgical Oncology Unit, University of Montreal Health Center, Montreal, QC, Canada

Department of Surgery, McGill University, Montreal, QC, Canada

General Surgical Oncology, Tom Baker cancer center, University of Calgary, Canada

Department of Surgery, Sun Yat-Sen University, Guangzhou, China

Department of Surgery, Hospital Clinic Barcelona, Barcelona, Spain

Department of General Surgery, Virgen de la Arrixaca University Hospital Ctra. Madrid-Cartagena, Murcia, Spain

Service de Chirurgie, Hôpital Maison Blanche, Reims, France

Service de Chirurgie, Hotel Dieu Lyon, CEDEX France, France

Chirurgie Cervico-Faciale, Institut de cancérologie Gustave Roussy, Paris, France

Service de Dermatologie & Unité de Recherches EA4339 Skin, Environment, Cancer, Université Versailles St-Quentin, APHP, Hôpital Ambroise Paré, Boulogne, France

Chirurgische Klinik und Poliklinik Innenstadt, Klinikum der Universität Munchen, Munchen, Germany

Department of Dermatology, Medical Center Minden,Minden, Germany

Department of Dermatology, University Hospital Essen, Essen, Germany

Department of General, Visceral, Vascular and Thoracic Surgery, University Medicine Berlin, Berlin, Germany

Division of Surgical Oncology & Thoracic Surgery, Mannheim University Medical Center, University of Heidelberg, Germany

Klinik für Allgemeine Chirurgie und Thoraxchirurgie UK S-H, Campus Kiel, Kiel, Germany

Klinikum Oststadt / Heidehaus und Grossburgwedel, Klinikum Region Hannover, Kliniken für Allgemein- und Visceralchirurgie, Hannover, Germany

Department of Dermatology, Klinikum Nord, Nürnberg, Germany

Department of Dermatology, University Hospital Erlangen, Erlangen, Germany

Department of Dermatology, University Hospital, Eberhard Karls University, Tübingen, Germany.

Department of Dermatology, University of Gottingen, Gottingen, Germany

Department of Dermatology and Allergology, Klinikum Augsburg, Augsburg, Germany.

Departments of 1General Surgery University Hospital of Heraklion, Crete, Greece

First Department of Medicine, Medical School, University of Athens, Athens, Greece

Department of Academic Surgery, Cork University, Hospital, Cork, Ireland

Department of Surgery C & Surgical Oncology, Sheba Medical Center, Tel Hashomer, Israel

Radioguided Surgery Unit, Sackler Faculty of Medicine, Tel-Aviv University, Tel-Aviv Sourasky Medical Center, Israel.

Department of Biomedical Sciences and Human Oncology, Section of Clinical and Oncological Dermatology, University of Turin, Torino, Italy.

Department of Dermatology, University Hospital Ospedali Civili, Brescia, Italy

Department of Surgery, Regina Elena National Cancer Institute, Roma, Italy

Division of Surgical Oncology, National Cancer Research Institute of Genova, Genova, Italy

Melanoma Unit, National Cancer Institute, Milan, Italy

Melanoma and Sarcoma Division, European Institute of Oncology, Milan, Italy

Cattedra di Chirurgia Generale, Policlinico Tor Vergata, Roma, Italy

Department of Surgery "Melanoma - Soft Tissues - Head & Neck - Skin Cancers", National Cancer Institute of Naples, Napoli, Italy.

Unità Operativa di Chirurgia Generale ed Oncologica, IRCCS, Istituto Clinico Humanitas, Milano, Italy

Melanoma and Sarcomas Unit, Veneto Insitute of Oncology, Padova, Italy

Surgery Branch, Department of Oncological and Surgical Sciences, University of Padova, Padova, Italy

Department of Experimental and Clinical Medicine, Faculty of Medicine, Catanzaro, Italy.

Immunotherapy Unit, Department of Medical Oncology, Istituto Scientifico Romagnolo per lo Studio e la Cura dei Tumori (I.R.S.T.), Meldola, Italy

Surgery, Casa di Cura Pio X, Milano, Italy

Department of Dermatology, Faculty of Medicine, University of Tokyo, Tokyo, Japan

Department of Dermatology, Graduate School of Medical Science, Kyushu University, Fukuoka, Japan

Department of Dermatology, Shinshu University School of Medicine, Matsumoto, Japan

Department of Dermatology, Shinshu University School of Medicine, Matsumoto, Japan.

Department of Skin Oncology / Dermatology, Comprehensive Cancer Center, Saitama Medical University International Medical Center, Saitama, Japan

Dermatology division, National Cancer Center Hospital, Tokyo, Japan

Department of Surgery, IJsselland Hospital, Capelle a/d IJssel, The Netherlands

Department of Surgery, Martini Hospital, Groningen, The Netherlands

Department of Surgery, Medisch Spectrum Twente, Enschede, The Netherlands

Department of Surgery, Reinier de Graaf Hospital, Delft, The Netherlands

Department of Surgery, The Netherlands Cancer Institute/Antoni van Leeuwenhoek Hospital, Amsterdam, The Netherlands

Department of Surgery, Admiraal de Ruiter Hospital, Goes, The Netherlands,

Department of Surgery, VieCuri Medical Centre, BX Venlo, The Netherlands.

Department of Surgery, Medisch Centrum Leeuwarden, Leeuwarden, The Netherlands

Department of Surgery, Admiraal de Ruiter Hospital, Goes, The Netherlands

Department of Surgery, Albert Schweitzer Hospital, Dordrecht, The Netherlands

Department of Surgery, Amphia Hospital, Breda, The Netherlands

Department of Surgery, Canisius Wilhelmina Hospital, Nijmegen, The Netherlands

Department of Surgery, Elisabeth Hospital, Tilburg, The Netherlands

Department of Surgery, Franciscus Hospital, Rosendaal, The Netherlands

Department of Surgery, Gemini Hospital, den Helder, The Netherlands

Department of Surgery, Haga Hospital,den Haag, The Netherlands

Department of Surgery, Hospital Gelderse Vallei, Ede, The Netherlands

Department of Surgery, Ikazia Hospital, Rotterdam, The Netherlands

Department of Surgery, Kennemer Gasthuis, Haarlem, The Netherlands

Department of Surgery, Lucas Andreas Hospital, Amsterdam, The Netherlands

Department of Surgery, Maastad Hospital, Rotterdam, The Netherlands

Department of Surgery, Medical Center Haaglanden, den Haag, The Netherlands

Department of Surgery, Radboud University Nijmegen Medical Center, Nijmegen, The Netherlands

Department of Surgery, Rijnstate Hospital, Arnhem, The Netherlands

Department of Surgery, Schieland Hospital, Schiedam, The Netherlands

Department of Surgery, Slingeland Hospital, Doetinchem, The Netherlands

Department of Surgery, St Jansdal Hospital, Harderwijk, The Netherlands

Department of Surgery, University Medical Center Utrecht, Utrecht, The Netherlands

Department of Surgery, Zaans Medical Center, Zaanstad, The Netherlands

Department of Soft Tissue/Bone Sarcoma, M. Sklodowska-Curie Memorial Cancer Center and Institute of Oncology, Warsaw, Poland

Department of Surgery, Wielkopolskie Centrum Onkologii, Poznań, Poland

Department of Surgery, Portuguese Institute of Cancer, Lisbon

Universitatea de Medicina si Farmacie „Iuliu Hatieganu” Cluj-Napoca, Romania

Clinic for Plastic and Reconstructive Surgery, Clinic Centre Nis, Nis, Serbia

Department of Surgical Oncology, Institute of Oncology Ljubljana, Ljubljana, Slovenia

Departments of Surgery, Lund and Helsingborg, Radiation Physics and Wallenberg Laboratory, Lund University, Lund, Sweden

Department of Reconstructive Surgery, University Hospital of Zurich, Zurich, Switzerland

Service de Chirurgie Viscérale, Centre Hospitalier Universitaire Vaudois, Lausanne, Switzerland

Department of Plastic and Reconstructive Surgery, Leeds General Infirmary, Leeds, UK

Department of Plastic and Reconstructive Surgery, Norfolk and Norwich University Hospital, Norwich, UK

Department of Plastic and Reconstructive Surgery, Royal Free Hospital, Hampstead, London, UK

Melanoma/Sarcoma Unit, Department of Surgery, Royal Marsden Hospital NHS Foundation Trust, London, UK.

Mount Vernon Cancer Centre, Northwood, Middlesex, UK

Department of Plastic and Reconstructive Surgery, Royal Devon and Exeter Hospital, Exeter, UK

Department of Plastic and Reconstructive Surgery, St George's Hospital, Tooting, London UK

Oncology and Radiology Department, Ternopil State Medical University, Ternopil, Ukraine

Department of Dermatology and Cutaneous Surgery, University of South Florida, College of Medicine, Tampa, FL, USA

Department of Dermatology, Harvard Medical School, Massachusetts General Hospital, Boston, MA, USA.

Department of Dermatology, University of Utah, Salt Lake City, UT, USA.

Department of Surgery, Arizona Cancer Center, University of Arizona, Tucson, AZ, USA.

Department of Surgery, Division Surgical Oncology, Roger Williams Medical Center, Providence, RI, USA

Department of Surgery, Johns Hopkins Medical Institutions, Baltimore, MD, USA

Department of Surgery, Memorial Sloan-Kettering Cancer Center, New York, NY, USA.

Department of Surgery, University of Alberta, Edmonton, Alberta, Canada.

Department of Surgery, University of Louisville School of Medicine, J. Graham Brown Cancer Center, Louisville, KY, USA

Department of Surgery, University of Virginia, Charlottesville, VA, USA

Department of Surgical Oncology, Fox Chase Cancer Center, Philadelphia, PA, USA.

Division of Surgical Oncology & Endocrine Surgery, Vanderbilt University Medical Center, Nashville, TN, USA

Division of Surgical Oncology, Cancer Care Pavilion, MetroHealth Medical Center, Cleveland, OH, USA

Division of Surgical Oncology, Department of Surgery, University of Cincinnati, Cincinnati, OH, USA

Division of Surgical Oncology, Winship Cancer Institute, Emory University, Atlanta, GA, USA.

Ear, Nose and Throat Specialty Care of Minnesota, Minneapolis, MN, USA.

Department of Surgical Oncology, John Wayne Cancer Institute at Saint John's Health Center, Santa Monica, CA, USA.

Department of Surgery, Northwestern University, Feinberg School of Medicine, Chicago IL, USA

Interdisciplinary Melanoma Cooperative Group, The New York University, New York, NY, USA

Plastic Surgery, Sharp Memorial Hospital, San Diego, CA, USA.

School of Medicine - Stony Brook University Medical Center, Newark, NJ, USA

Skin Tumour Unit, St John's Institute of Dermatology, St Thomas hospital, London, UK

Department of Surgery, The Lankenau Institute for Medical Research, Wynnewood, PA, USA

General Surgery, St. Antony's Medical Centre, St Louis, MO, USA

Surgical Oncology Service, Wake Forest University, Winston-Salem, NC, USA

University of Minnesota and Veterans Affairs Medical Center, Minneapolis, MN, USA

Department of Surgery, Division of Plastic Surgery, Penn state Hershey Cancer Institute, Hershey, PA, USA

Oncology Services, Surgery, Sentara Careplex Hospital Sentara, Newport News, VA, USA

Surgical Oncology at Mercy, The Institute for Cancer Care, Mercy Medical Center, Baltimore, MD, USA

General Surgery, One Medical Center Drive, Lebanon, NH, USA

Division of Surgical Oncology, Cancer Centre, Ann Arbor, MI, USA

Division of Surgical Oncology, The University of North Carolina at Chapel Hill School of Medicine, Chapel Hill, NC, USA
